# Supplementary material for: Ultrafast and scalable laser liquid synthesis of tin oxide nanotubes and its application in lithium ion batteries
Source: Royal Society of Chemistry journal article supplement (doi:10.1039/c3nr06444a), 2014-01-01
Supplement: c3nr06444a1.pdf [file c3nr06444a1.pdf]

## Supporting Information

### Ultrafast and scalable laser liquid synthesis of tin oxide nanotubes and its application in lithium ion batteries

*Zhikun Liu<sup>+</sup>, Zeyuan Cao<sup>+</sup>, Prashant Kumar, Biwei Deng, Yuefeng Wang, C. Richard Liu, Bingqing Wei<sup>\*</sup>, Gary J. Cheng<sup>\*</sup>*

#### Figure captions

**Fig. S1.** Comparison of Nyquist plots for the 1<sup>st</sup>, 5<sup>th</sup>, 25<sup>th</sup> and 100<sup>th</sup> cycle at the rate of 0.1 C. Inset: the curves in full scale.

**Fig. S2.** SEM images of the SnO<sub>2</sub> nanotubes after continuous discharge/charge cycling at 0.1 C. (a) The marked area of collapsed nanotubes. (b) Cracked nanotubes. (c) The curled edges of nanotubes in magnified image. (d) Nanotube bundles by SEI layers. (e) Top view of a single SnO<sub>2</sub> nanotube. (f) Interior of a single cracked nanotube.

\* corresponding authors

+ authors contributed equally to the paper

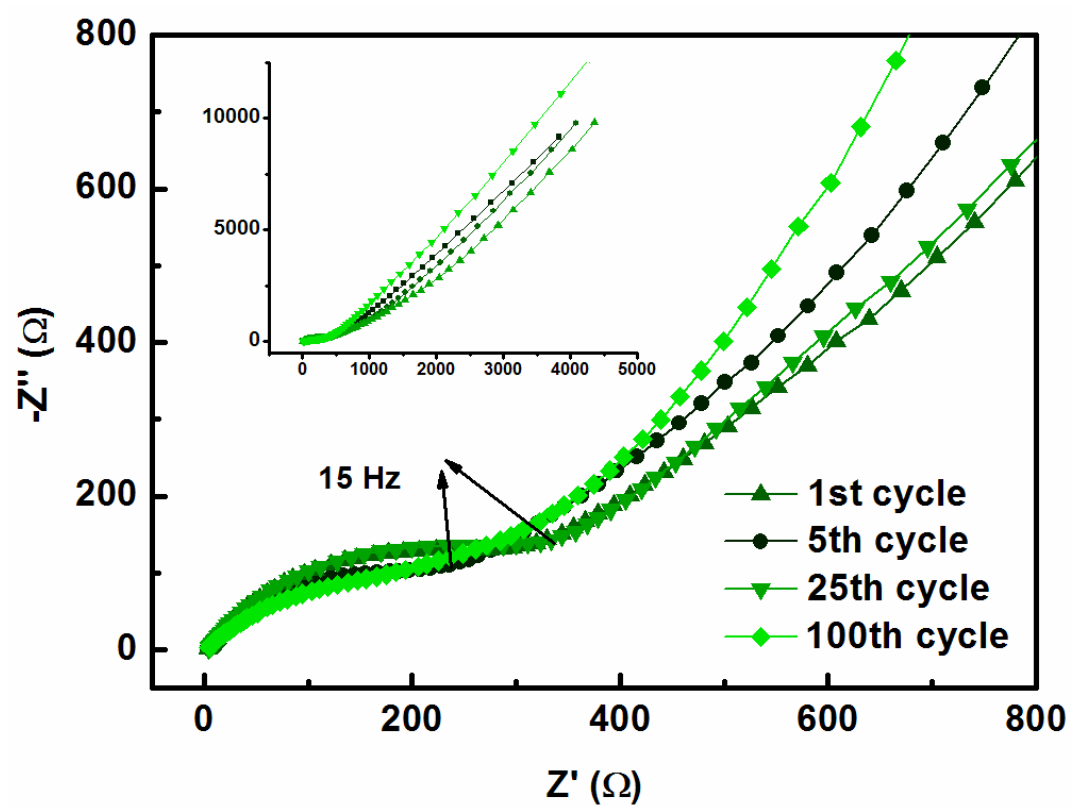

Fig S1

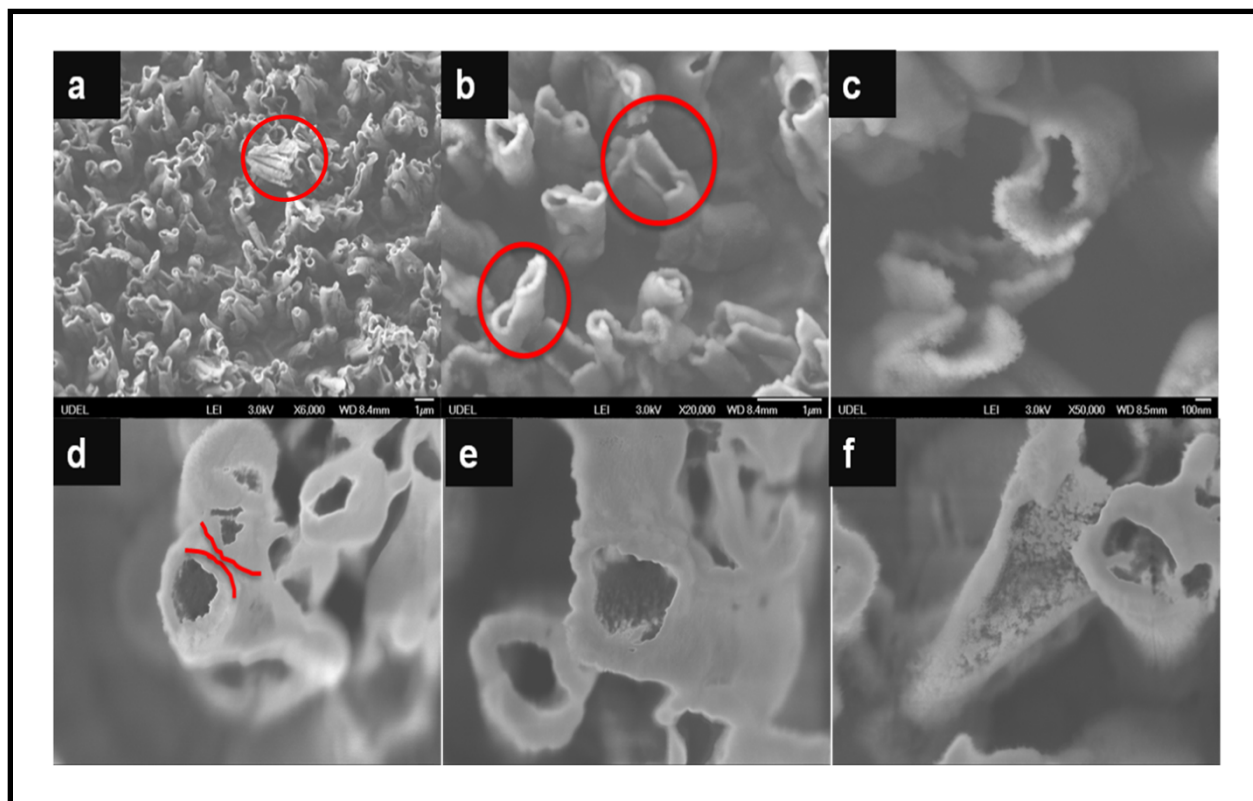

**Fig S2**
